# Supplementary material for: Aromatic imide/amide-based organic small-molecule emitters for organic light-emitting diodes
Source: Royal Society of Chemistry journal article supplement (doi:10.1039/d0qm00084a), 2020-01-01
Supplement: d0qm00084a1.pdf [file d0qm00084a1.pdf]

## Supporting Information

### Aromatic imide/amide-based organic small-molecule emitters for organic light-emitting diodes

Yuanyuan Qin<sup>a,b</sup>, Guoping Li<sup>\*a</sup>, Ting Qi<sup>\*b</sup>, Hui Huang<sup>\*c</sup>

<sup>a</sup>Green Catalysis Center, College of Chemistry, Zhengzhou University, Zhengzhou 450001, China

E-mail: liguoping@zzu.edu.cn

<sup>b</sup>School of Chemical Sciences, University of Chinese Academy of Sciences, Beijing, 100049, China

E-mail: qiting@ucas.ac.cn

<sup>c</sup>College of Materials Science and Optoelectronic Technology & CAS Key Laboratory of Vacuum Physics, University of Chinese Academy of Sciences, Beijing, 100049, China

E-mail: huihuang@ucas.ac.cn

#### DFT Calculations

All calculations were carried out using the Gaussian 09 program.<sup>S1</sup> The geometries of substances were optimized using B3LYP<sup>S2, S3</sup>/6-31G (d, p) method. The vibrational frequency was calculated at the same level to confirm whether the optimized geometry is a minimum on the potential energy surface. The optimized geometries of **MAI**, **PHI**, **NAI** and **PDI** are shown in Table S1, S2, S3 and S4.

**Table S1.** Optimized geometry of **MAI**.

| Atom | X         | Y         | Z         |
|------|-----------|-----------|-----------|
| C    | 1.151485  | -0.193786 | -0.000145 |
| C    | 0.680894  | -1.622344 | 0.000235  |
| C    | -0.655060 | -1.633274 | 0.000221  |
| C    | -1.148206 | -0.212035 | -0.000158 |
| N    | -0.005876 | 0.591835  | -0.000139 |
| O    | 2.292794  | 0.220011  | -0.000236 |
| O    | -2.294156 | 0.188618  | -0.000219 |
| C    | -0.019732 | 2.042998  | 0.000325  |
| H    | 1.376431  | -2.451134 | 0.000374  |
| H    | -1.336199 | -2.473899 | 0.000350  |
| H    | 1.017696  | 2.378478  | -0.007583 |
| H    | -0.538078 | 2.422441  | -0.884245 |
| H    | -0.524114 | 2.422879  | 0.892849  |

**Table S2.** Optimized geometry of **PHI**.

| Atom | X         | Y         | Z         |
|------|-----------|-----------|-----------|
| C    | -0.889875 | 1.168249  | 0.000193  |
| C    | 0.527809  | 0.697082  | 0.000194  |
| C    | 0.525859  | -0.699431 | 0.000183  |
| C    | -0.894059 | -1.164448 | 0.000193  |
| N    | -1.673234 | 0.001945  | -0.000085 |
| O    | -1.317969 | 2.305144  | -0.000377 |
| O    | -1.332639 | -2.297332 | -0.000354 |
| C    | -3.124517 | -0.000641 | 0.000212  |
| C    | 1.710565  | 1.420946  | 0.000024  |
| C    | 2.909666  | 0.696048  | 0.000003  |
| C    | 2.907806  | -0.704281 | 0.000007  |
| C    | 1.706832  | -1.426104 | 0.000016  |
| H    | -3.453857 | 1.038565  | -0.020812 |
| H    | -3.505197 | -0.530166 | -0.877037 |
| H    | -3.506987 | -0.493157 | 0.89827   |
| H    | 1.699381  | 2.505929  | -0.000046 |
| H    | 3.856947  | 1.226654  | -0.000028 |
| H    | 3.853706  | -1.237378 | -0.000009 |
| H    | 1.693002  | -2.511079 | -0.000046 |

**Table S3.** Optimized geometry of NAI.

| Atom | X        | Y        | Z        |
|------|----------|----------|----------|
| C    | 0.729846 | 2.423378 | 0.000926 |
| C    | 2.137258 | 2.421471 | -0.01318 |
| C    | 2.831408 | 1.232296 | -0.01762 |
| C    | 2.147719 | -0.01051 | -0.01014 |
| C    | 0.721597 | -0.00285 | 0.00094  |
| C    | 0.028533 | 1.231936 | 0.003561 |
| C    | 2.817724 | -1.26084 | -0.01417 |
| C    | 2.111031 | -2.44267 | -0.00722 |
| C    | 0.703635 | -2.42965 | 0.005144 |
| C    | 0.016238 | -1.23037 | 0.004629 |
| C    | -1.46424 | -1.23483 | 0.010986 |
| N    | -2.09448 | 0.013371 | -0.10299 |
| C    | -1.45303 | 1.258503 | 0.014519 |
| O    | -2.0844  | 2.299463 | 0.134654 |
| O    | -2.11962 | -2.26141 | 0.125675 |

|   |          |          |          |
|---|----------|----------|----------|
| C | -3.5595  | -0.00428 | -0.12958 |
| H | 0.165872 | 3.355053 | 0.009273 |
| H | 2.682345 | 3.364738 | -0.02087 |
| H | 3.921675 | 1.240028 | -0.02821 |
| H | 3.907846 | -1.28041 | -0.02412 |
| H | 2.646305 | -3.39156 | -0.01187 |
| H | 0.129144 | -3.35492 | 0.013654 |
| H | -3.91671 | 1.007617 | -0.32247 |
| H | -3.91084 | -0.68983 | -0.90714 |
| H | -3.9415  | -0.35831 | 0.837354 |

**Table S4.** Optimized geometry of PDI.

| Atom | X         | Y         | Z         |
|------|-----------|-----------|-----------|
| C    | -2.882571 | 2.418841  | 0.000194  |
| C    | -1.483755 | 2.429237  | 0.000186  |
| C    | -0.736499 | 1.249695  | -0.000101 |
| C    | -1.431626 | -0.001394 | -0.000074 |
| C    | -2.860856 | -0.002741 | -0.000017 |
| C    | -3.574052 | 1.220238  | 0.000045  |
| C    | -0.734024 | -1.25094  | 0.000253  |
| C    | -1.479545 | -2.431525 | 0.000768  |
| C    | -2.87828  | -2.423527 | 0.000521  |
| C    | -3.57321  | -1.226568 | 0.000053  |
| C    | 0.734024  | 1.25094   | -0.000283 |
| C    | 1.431626  | 0.001394  | 0.000075  |
| C    | 0.736499  | -1.249695 | 0.000133  |
| C    | 1.479545  | 2.431525  | -0.000882 |
| C    | 2.87828   | 2.423527  | -0.000654 |
| C    | 3.57321   | 1.226568  | -0.000119 |
| C    | 2.860856  | 0.002741  | 0.000018  |
| C    | 3.574052  | -1.220238 | 0.00002   |
| C    | 2.882571  | -2.418841 | -0.000059 |
| C    | 1.483755  | -2.429237 | -0.000069 |
| C    | 5.056878  | 1.251444  | 0.000293  |
| N    | 5.704497  | 0.006403  | 0.000089  |
| C    | 5.0562    | -1.234817 | -0.000128 |
| C    | -5.056878 | -1.251443 | -0.000364 |
| N    | -5.704497 | -0.006403 | -0.000091 |

|   |           |           |           |
|---|-----------|-----------|-----------|
| C | -5.0562   | 1.234817  | 0.000197  |
| O | -5.707598 | 2.271095  | 0.000462  |
| O | -5.690148 | -2.298795 | -0.000858 |
| O | 5.690147  | 2.298796  | 0.000727  |
| O | 5.707598  | -2.271095 | -0.000334 |
| C | -7.171416 | 0.024293  | -0.000019 |
| C | 7.171416  | -0.024294 | 0.000018  |
| H | -3.447667 | 3.344435  | 0.0004    |
| H | -0.984853 | 3.390455  | 0.000528  |
| H | -0.979294 | -3.392035 | 0.001433  |
| H | -3.441022 | -3.350435 | 0.000675  |
| H | 0.979294  | 3.392035  | -0.001609 |
| H | 3.441022  | 3.350435  | -0.00087  |
| H | 3.447667  | -3.344435 | -0.000203 |
| H | 0.984854  | -3.390455 | -0.000349 |
| H | -7.52343  | -1.003927 | 0.000499  |
| H | -7.529569 | 0.555055  | 0.884379  |
| H | -7.529796 | 0.554014  | -0.884973 |
| H | 7.523431  | 1.003926  | -0.000564 |
| H | 7.529796  | -0.553961 | 0.885004  |
| H | 7.529567  | -0.555111 | -0.884347 |

### The abbreviations of material names mentioned in the review

ITO: indium-tin oxide

NPB: (*N,N'*-di(1-naphthyl)-*N,N'*-diphenyl-(1,1'-biphenyl)-4,4'-diamine)

BCP: 2,9-dimethyl-4,7-diphenyl-1,10-phenanthroline

$\alpha$ -NPD(NPD): 4,4'-bis[*N*-(1-naphthyl)-*N*-phenyl]biphenyl diamine

TPBi: 1,3,5-tris(*N*-phenylbenzimidazole-2-yl)benzene

TPBi (1,3,5-tris(1-phenyl-1*H*-benzo[*d*]imidazol-2-yl)benzene)

mCBP: 3,3'-di(9*H*-carbazol-9-yl)biphenyl

CBP: 4,4'-bis(9-carbazolyl)-1,1'-biphenyl

HAT-CN: dipyrazino(2,3-*f*:2',3'-*h*)-quinoxaline-2,3,6,7,10,11-hexacarbonitrile

TAPC: 1,1-bis-[4-[*N,N*-di(*p*-tolyl)amino]phenyl]cyclohexane

TmPyPB: 1,3,5-tri(*m*-pyrid-3-yl-phenyl)benzene

TCTA: 4,4',4''-tris(carbazol-9-yl)triphenylamine

TcTa: (4,4',4''-tri(*N*-carbazolyl)triphenylamine)

PVK : poly(9-vinylcarbazole)

mCP: 3-bis(9-carbazolyl)benzene

TSPO1: diphenyl-4-triphenylsilylphenyl-phosphineoxide  
CuPc : phthalocyanine copper  
TAPC: 1,1-bis-[4-[*N,N*-di(*p*-tolyl)amino]phenyl]cyclohexane  
3TPYMB: tris-[3-(3-pyridyl)mesityl]borane  
mCPCN: 9-(3-(9*H*carbazol-9-yl)phenyl)-9*H*-carbazole-3-carbonitrile  
PFO: poly(9,9-dioctylfluorene)  
Bphen: 4,7-diphenyl-1,10-phenanthroline  
4CzTNA: 2-(4-tert-butylphenyl)-6-(9-(4-tertbutylphenyl)-9*H*-carbazol-3-yl)-1*H*-benzo[*de*]isoquinoline-1,3-(2*H*)-dione  
CzPhONI: 6-{3,5-Bis-[9-(4-*t*-butylphenyl)-9*H*-carbazol-3-yl]-phenoxy}-2-(4-*t*-butylphenyl)benzo[*de*]isoquinoline-1,3-dione

## References

- S1 M. J. Frisch, G. W. Trucks, H. B. Schlegel, G. E. Scuseria, M. A. Robb, J. R. Cheeseman, V. G. Zakrzewski, J. A. Montgomery, R. E. Stratmann, J. C. Burant, S. J. Dapprich, M. A. Millam, D. K. Daniels, N. M. Kudin, C. Strain, O. Farkas, J. Tomasi, V. Barone, M. Cossi, R. Cammi, B. Mennucci, C. Pomelli, C. Adamo, S. Clifford, J. Ochterski, G. A. Petersson, P. Y. Ayala, Q. Cui, K. Morokuma, A. D. Malick, K. D. Rabuck, K. Raghavachari, J. B. Foresman, J. Cioslowski, J. V. Ortiz, A. G. Baboul, B. B. Stefanov, G. Liu, A. Liashenko, P. Piskorz, I. Komaromi, R. Gomperts, R. L. Martin, D. J. Fox, T. Keith, M. A. Al-Laham, C. Y. Peng, A. Nanayakkara, M. Challacombe, P. M. W. Gill, B. Johnson, W. Chen, M. W. Wong, J. L. Andres, C. Gonzalez, M. Head-Gordon, E. S. Replogle, J. A. Pople, *Gaussian 09*, G. I. Revision A. 1-SMP, Wallingford, CT, 2009.
- S2 A. D. Becke, Density-functional thermochemistry. III. The role of exact exchange, *Journal of Chemical Physics*, 1993, **98**, 5648–5652.
- S3 C. Lee, W. Yang, R. G. Parr, Development of the Colle-Salvetti correlation- formula into a functional of the electron density, *Physical Review B*, 1988, **37**, 785–789.
